# Supplementary material for: The Effect of Hypoxia and Metformin on Fatty Acid Uptake, Storage, and Oxidation in L6 Differentiated Myotubes
Source: PubMed Central journal article supplement (PMC6199370; doi:10.3389/fendo.2018.00616), 2018-10-17

# FATP4 7day

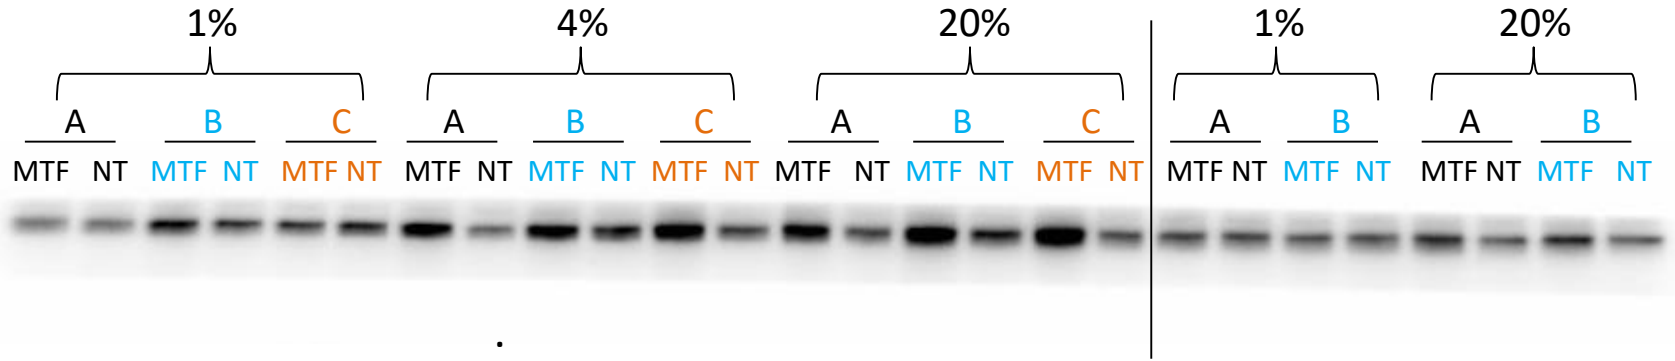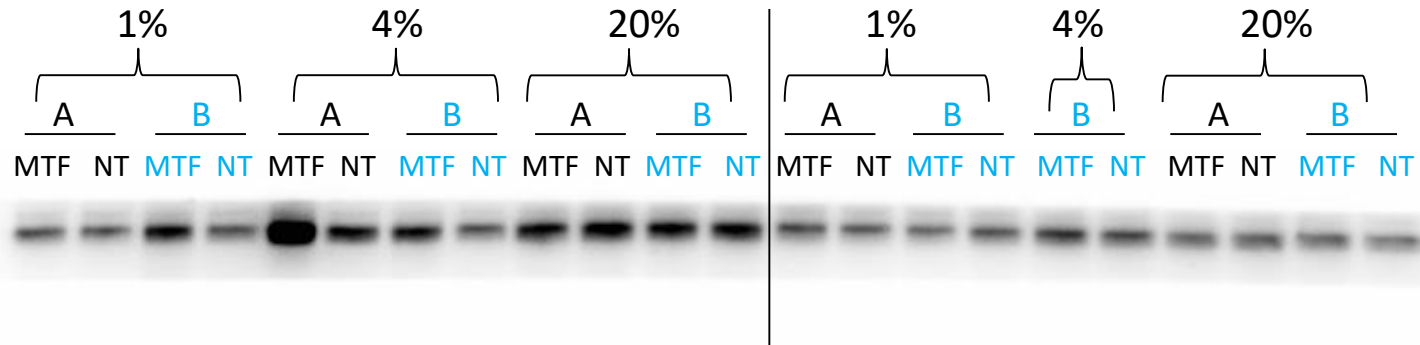

GAPDH for FATP4 7days

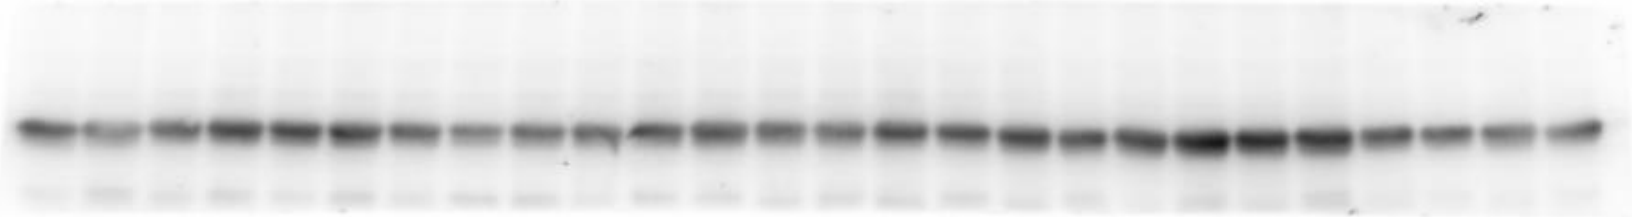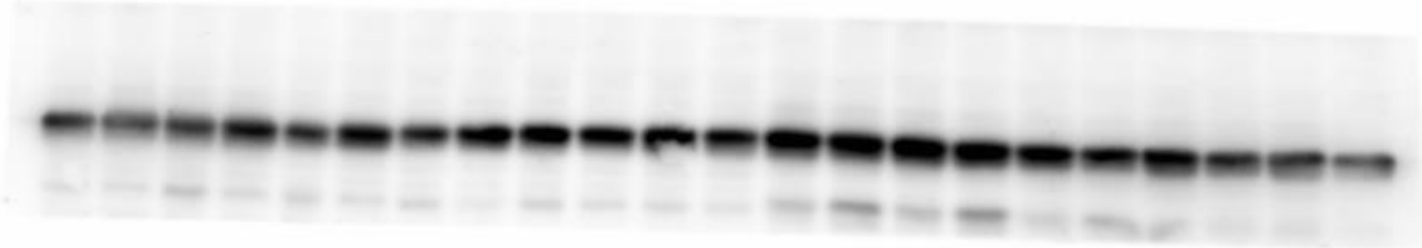

# CD36 7days

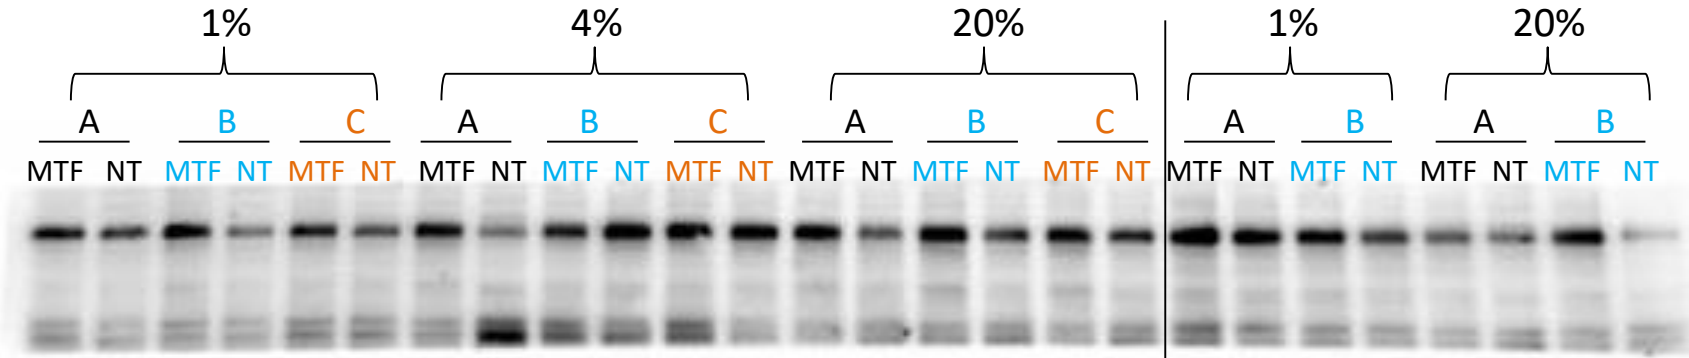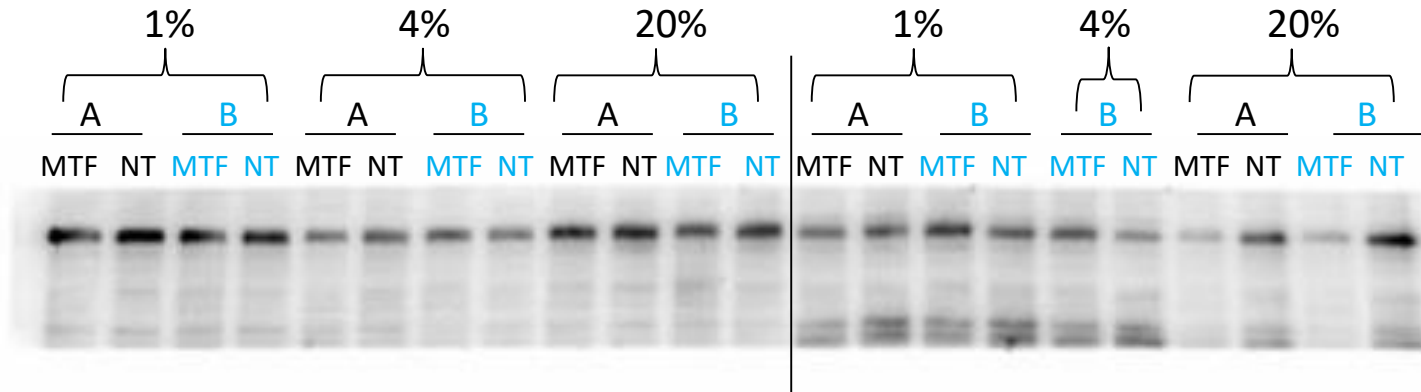

GAPDH for CD36 7 days

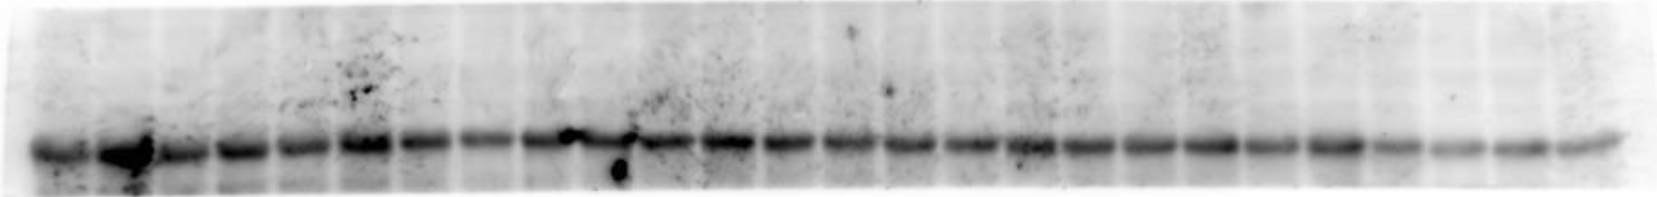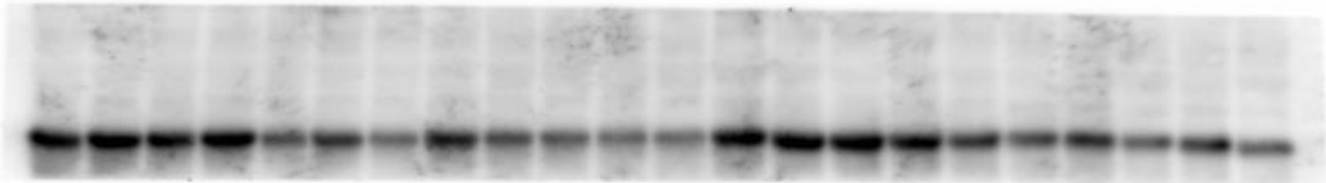

Supplement: Data_Sheet_1.pdf [file Data_Sheet_1.pdf]
